# Supplementary material for: Discovery of T Cell Antigens by High-Throughput Screening of Synthetic Minigene Libraries
Source: PLoS One. 2012 Jan 12;7(1):e29949. doi: 10.1371/journal.pone.0029949 (PMC3257230; doi:10.1371/journal.pone.0029949)
Supplement: Table S1 — The Gene name, Affymetrix probeset number, percentile score (P), the entropy score (Q), P and Q ranking, and the number of tissues expressing the gene (N) are presented for each of 186 genes evaluated. The source column indicates whether the gene was evaluated by Wenzlau and Hutton (listed as H, reference 8), or was identified using a combination of P, N and Q scores (listed as P) as described in materials and methods, or was chosen as being co-expressed in islets and glomeruli (listed as G). (XLS) [file pone.0029949.s001.xls]

## Sheet: Sheet1
Supplementary Table 1 (Stone)
gene	probe	P	Q	rank_P	rank_Q	N	source
GCG	206422_at	0.797	1.65	1	1	2	P		source;	P=based on combined criteria for probes
IAPP	207062_at	0.767	2.33	2	3	2	PH			H=Hutton et al. genes (PMID # 17942684)
INS	206598_at	0.691	1.74	3	2	2	PH			G=based on common expression in glomeruli
REG3G	gnf1h03859_at	0.556	4.46	4	23	0	PH
PPY	210670_at	0.471	5.36	5	37	1	P
REG1B	205886_at	0.471	3.91	6	16	7	P
SST	213921_at	0.449	5.15	7	34	30	P
REG1A	209752_at	0.436	3	8	4	2	P
REG3A	205815_at	0.435	4.65	9	28	89	PH
SPINK1	206239_s_at	0.386	3.3	11	9	5	P
PCSK1	205825_at	0.377	5.72	12	41	16	P
CPA1	gnf1h04772_x_at	0.343	3.14	13	6	1	P
CPA1	205615_at	0.279	3.17	23	7	2	P
SCGB2A1	205979_at	0.316	5.83	17	44	6	P
CUZD1	220275_at	0.301	5.21	18	35	2	P
CUZD1	gnf1h05367_at	0.234	5.64	41	40	2	P
CUZD1	gnf1h05368_s_at	0.15	7.91	56	67	2	P
CTRB2	214411_x_at	0.299	4.62	19	26	36	P
GP2	206681_x_at	0.296	4.51	20	24	2	P
GP2	208473_s_at	0.27	5.07	29	33	5	P
GP2	214324_at	0.264	4.2	30	22	5	P
GP2	214325_at	0.18	7.71	50	65	1	P
CEL	205910_s_at	0.295	3.11	21	5	4	PH
ELA3B	206151_x_at	0.29	3.72	22	12	2	P
OLFM4	212768_s_at	0.275	4.7	24	29	11	P
SCGN	205697_at	0.275	6.89	25	56	1	PH
PNLIPRP1	210722_at	0.271	6.57	26	50	1	P
PNLIPRP1	206694_at	0.244	5.23	36	36	2	P
PRSS1	216470_x_at	0.27	4.1	27	19	15	P
PRSS1	205869_at	0.241	3.66	39	11	3	P
ELA3A	210080_x_at	0.27	3.91	28	17	6	P
ELA3A	211738_x_at	0.249	4.61	33	25	11	P
CPB1	205509_at	0.253	4.65	31	27	9	P
PNLIPRP2	211766_s_at	0.251	3.36	32	10	2	P
PNLIPRP2	217343_at	0.004	14	27453	28686	NA	P
CRP	37020_at	0.245	7.21	34	58	1	P
CRP	205753_at	0.052	10.2	193	342	0	P
CLPS	206131_at	0.245	4.19	35	21	4	P
CFTR	205043_at	0.242	6.85	37	54	2	PH
CFTR	215702_s_at	0.053	10.26	184	361	3	PH
CFTR	215703_at	0.019	11.75	3026	3842	NA	PH
CFTR	217026_at	0.013	12.42	10434	13251	NA	PH
CHGA	204697_s_at	0.237	6.72	40	53	55	P
PLA2G1B	206311_s_at	0.232	3.99	42	18	10	P
PNLIP	205912_at	0.221	4.15	43	20	3	P
SERPINA3	202376_at	0.206	6.51	44	49	48	P
LCN2	212531_at	0.204	6.24	45	48	26	P
PRSS3	207463_x_at	0.204	5.51	46	39	29	P
PRSS3	213421_x_at	0.201	5.82	48	43	45	P
CPA2	206212_at	0.186	6.2	49	47	77	P
CTRC	206297_at	0.173	5.39	51	38	20	P
ELA2A	206447_at	0.17	3.88	52	15	2	P
PAX6	205646_s_at	0.166	7.7	53	64	5	PH
SCG5	203889_at	0.154	7.62	54	61	66	P
TMOD1	203662_s_at	0.154	7.81	55	66	4	P
TMOD1	203661_s_at	0.074	9.56	107	196	69	P
TTR	209660_at	0.149	6.01	57	45	24	P
INSM1	206502_s_at	0.141	8.08	58	75	10	PH
PDK4	205960_at	0.134	8.62	59	100	27	P
CRYBA2	220136_s_at	0.13	8.78	60	118	NA	P
GNAS	214157_at	0.129	8.6	61	98	107	PH
GNAS	217057_s_at	0.071	9.87	114	248	2	PH
GNAS	217673_x_at	0.043	10.61	272	552	91	PH
GNAS	211858_x_at	0.034	10.79	455	707	153	PH
GNAS	200981_x_at	0.03	11.11	680	1150	156	PH
GNAS	214548_x_at	0.029	11.19	712	1334	141	PH
GNAS	212273_x_at	0.029	11.16	719	1266	156	PH
GNAS	gnf1h01371_at	0.027	11.28	845	1562	NA	PH
GNAS	200780_x_at	0.026	11.33	1075	1689	156	PH
GNAS	217058_at	0.013	12.32	10429	11380	NA	PH
MMP7	204259_at	0.125	8.7	62	109	5	P
SOD2	215223_s_at	0.123	8.03	64	70	54	P
SOD2	216841_s_at	0.122	8.22	66	81	45	P
SOD2	221477_s_at	0.087	9.24	91	157	86	P
SOD2	215078_at	0.021	11.52	2084	2462	30	P
PAPSS2	203060_s_at	0.123	8.05	65	73	43	P
PAPSS2	203058_s_at	0.103	8.67	70	106	51	P
PAPSS2	203059_s_at	0.049	10.43	215	432	79	P
WNT4	208606_s_at	0.121	8.67	67	107	0	P
ELL2	214446_at	0.117	8.63	68	104	0	P
ELL2	gnf1h00109_s_at	0.085	8.99	94	131	7	P
ELL2	214445_at	0.014	12.33	8590	11551	NA	P
ABCC8	210246_s_at	0.107	9	69	133	NA	P
ABCC8	210245_at	0.021	11.69	2149	3401	NA	P
SPP1	209875_s_at	0.102	8.3	71	85	95	P
C10orf10	209182_s_at	0.101	8.62	72	101	18	P
C10orf10	209183_s_at	0.091	8.9	86	123	19	P
IER3	201631_s_at	0.101	8.3	73	83	95	P
CCL20	205476_at	0.1	7.62	74	62	4	P
SCG2	204035_at	0.099	8.3	76	84	48	PH
SCG3	219196_at	0.097	8.49	77	91	27	PH
VGF	205586_x_at	0.097	9.39	78	180	28	P
CPE	201116_s_at	0.095	8.59	79	96	49	PH
CPE	201117_s_at	0.053	9.39	189	178	87	PH
INHBA	210511_s_at	0.094	7.63	80	63	7	P
INHBA	204926_at	0.005	13.83	26820	28264	NA	P
GC	204965_at	0.094	6.59	81	51	6	P
CHGB	204260_at	0.094	8.22	82	80	46	PH
TM4SF4	209937_at	0.092	8.02	83	69	NA	PH
QPCT	205174_s_at	0.092	8.38	84	88	29	P
EPCAM	201839_s_at	0.092	8.05	85	72	46	P
FOXA2	40284_at	0.089	8.95	87	127	NA	P
FOXA2	210103_s_at	0.039	10.8	330	721	NA	P
FOXA2	214312_at	0.015	12.22	6891	9545	NA	P
TPPP3	218876_at	0.089	8.51	88	93	15	PG
CRYPTIC	gnf1h00803_at	0.088	9.38	89	177	4	P
PAM	202336_s_at	0.088	9.12	90	142	89	P
PAM	212958_x_at	0.05	10.25	206	360	139	P
PAM	214620_x_at	0.038	10.81	345	740	75	P
SERPINB7	206421_s_at	0.087	9.25	92	159	NA	P
ERO1LB	220012_at	0.086	9.18	93	152	1	PH
DNAJC12	218976_at	0.085	9.25	95	161	25	P
PTGS2	204748_at	0.084	8.21	96	79	23	P
NEUROD1	206282_at	0.083	8.34	97	86	6	P
MT1M	217546_at	0.082	8.59	98	97	24	P
CXCL2	209774_x_at	0.082	8.54	99	94	36	P
SLC39A14	212110_at	0.081	9.18	100	151	44	P
RAB3B	205924_at	0.08	8.78	101	116	4	PG
RAB3B	205925_s_at	0.063	10.01	139	288	10	PG
APBB2	213419_at	0.078	9.45	102	187	1	P
APBB2	212985_at	0.034	10.99	454	962	49	P
APBB2	40148_at	0.027	11.22	853	1409	13	P
APBB2	212970_at	0.021	11.76	2111	3927	NA	P
APBB2	216750_at	0.013	12.47	10456	14256	NA	P
APBB2	216747_at	0.007	13.19	23282	25067	NA	P
APBB2	212972_x_at	0.007	13.27	23501	25685	NA	P
NKX2-2	206915_at	0.076	9.17	105	150	2	P
DUOX2	219727_at	0.07	9.2	116	154	4	P
DUOX2	gnf1h02923_at	0.008	12.97	20986	22918	NA	P
DUOX2	gnf1h02924_x_at	0.005	13.46	25954	26859	NA	P
PEMT	207621_s_at	0.068	9.22	120	155	7	P
SLC30A8	gnf1h08100_at	0.067	9.87	121	249	0	PH
SLC30A8	gnf1h06210_at	0.048	10.56	216	515	1	PH
ISL1	206104_at	0.067	9.9	123	254	0	P
STBD1	203986_at	0.067	9.79	124	227	2	P
SLC7A8	216603_at	0.066	9.12	125	143	2	P
SLC7A8	216604_s_at	0.05	9.91	204	256	3	P
SLC7A8	202752_x_at	0.039	10.25	337	358	NA	P
SLC7A8	216092_s_at	0.036	10.85	394	792	96	P
SLC7A8	217248_s_at	0.028	11.18	782	1312	NA	P
MNX1	214614_at	0.066	9.33	126	172	8	P
ABCC3	208161_s_at	0.066	8.99	127	130	7	P
ABCC3	209641_s_at	0.028	10.77	799	691	NA	P
ABCC3	214979_at	0.011	12.65	15101	17798	NA	P
GNMT	210328_at	0.065	8.06	131	74	4	P
LOC138255	gnf1h09342_at	0.064	9.49	132	190	0	P
FXYD2	205674_x_at	0.063	8.5	140	92	30	PH
FXYD2	207434_s_at	0.043	9.86	275	246	51	PH
FXYD2	gnf1h02291_at	0.016	11.32	5151	1685	NA	PH
FXYD2	gnf1h08842_at	0.012	12.5	11624	14975	NA	PH
FXYD2	gnf1h01832_s_at	0.005	13.52	25990	27157	NA	PH
RP11-265F14.2	207077_at	0.062	7.47	142	60	4	P
PPP1R1A	205478_at	0.062	8.12	143	76	19	P
TGM2	211003_x_at	0.061	8.25	147	82	7	P
TGM2	201042_at	0.042	10.07	293	304	49	P
TGM2	211573_x_at	0.034	10.54	456	499	17	P
TGM2	216183_at	0.006	13.52	24957	27140	NA	P
SYCN	gnf1h09632_at	0.06	5.01	148	31	2	P
NCOA7	gnf1h06242_at	0.059	9.93	151	258	1	P
NCOA7	gnf1h04631_s_at	0.047	10.53	228	495	NA	P
NCOA7	gnf1h06244_s_at	0.013	12.09	9667	7574	NA	P
NCOA7	gnf1h06243_at	0.012	12.57	11802	16364	112	P
ELF3	201510_at	0.057	10.11	161	311	5	P
ELF3	210827_s_at	0.048	10.42	221	429	31	P
MUC6	gnf1h11011_at	0.016	12.21	4961	9455	26	P
MUC6	gnf1h11011_at	0.016	12.21	4961	9456	26	P
MUC6	gnf1h11011_at	0.016	12.21	4962	9455	26	P
MUC6	gnf1h11011_at	0.016	12.21	4962	9456	26	P
MUC6	gnf1h10524_at	0.009	13.01	18446	23403	NA	P
CLDN7	202790_at	0.056	9.27	166	163	3	P
RRAGD	221524_s_at	0.055	9.8	169	232	7	P
RRAGD	221523_s_at	0.038	10.65	340	581	80	P
LOC400451	gnf1h06568_s_at	0.054	9.54	176	195	3	P
NR5A2	210174_at	0.054	10.25	178	359	8	P
NR5A2	208343_s_at	0.041	10.35	300	397	NA	P
NR5A2	208337_s_at	0.019	11.92	3149	5381	15	P
GADD45G	204121_at	0.054	9.8	181	229	8	P
GCNT3	219508_at	0.053	10.15	183	328	6	P
STC1	204597_x_at	0.05	9.62	209	201	2	P
STC1	204595_s_at	0.028	11.19	810	1323	7	P
STC1	204596_s_at	0.026	11.4	1057	1927	5	P
ANXA10	210143_at	0.049	10.11	212	313	1	P
AQP8	206784_at	0.049	9.94	214	260	2	P
RBP4	219140_s_at	0.047	6.85	230	55	10	P
RBP4	222049_s_at	0.014	11.77	8115	4025	NA	P
MUC1	213693_s_at	0.047	8.38	231	89	12	P
MUC1	207847_s_at	0.023	11.2	1553	1347	92	P
MUC1	211695_x_at	0.019	11.83	3098	4523	49	P
RARRES1	221872_at	0.056	9.39	162	181	11	P
RARRES1	206392_s_at	0.047	9.48	234	188	9	P
RARRES1	206391_at	0.028	10.67	806	598	NA	P
SERPINA1	202833_s_at	0.046	8.04	243	71	29	P
SERPINA1	211429_s_at	0.039	8.49	326	90	52	P
SERPINA1	211428_at	0.009	12.95	19820	22623	NA	P
TACSTD2	202286_s_at	0.046	8.62	244	99	35	P
TACSTD2	202287_s_at	0.007	13.25	24108	25503	NA	P
TACSTD2	202285_s_at	0.006	13.59	25652	27431	NA	P
C6	210168_at	0.04	10.33	309	386	2	P
HSD17B2	204818_at	0.038	8.97	357	128	8	P
IL8	211506_s_at	0.035	8.15	424	78	17	P
IL8	202859_x_at	0.031	8.76	619	114	49	P
CRISP3	207802_at	0.031	8.34	606	87	6	P
MMP1	204475_at	0.022	7.03	1845	57	8	P
ACPP	204393_s_at	0.021	9.01	2217	134	7	P
CCL2	216598_s_at	0.02	7.96	2493	68	9	P
FGB	204988_at	0.02	9.11	2666	141	6	P
FGB	216238_s_at	0.013	9.6	10497	199	6	P
PCK1	208383_s_at	0.019	8.73	3147	111	8	P
ITIH4	206287_s_at	0.015	8.13	7300	77	NA	P
ITIH4	37201_at	0.013	12.43	10019	13496	76	P
ALDOB	211357_s_at	0.01	8.89	17665	121	10	P
ALDOB	204704_s_at	0.007	11.21	23968	1379	NA	P
ALDOB	217238_s_at	0.005	9.65	26272	206	9	P
ALDOB	204705_x_at	0.003	10.47	28791	452	NA	P
TFPI2	209278_s_at	0.01	8.56	17816	95	8	P
TFPI2	209277_at	0.009	10	19978	285	13	P
APOH	205216_s_at	0.01	8.71	18090	110	6	P
GAD2	206780_at	0.05	9.97	208	272	24	H
GAD2	216651_s_at	0.018	11.89	3626	5100	NA	H
GAD2	211264_at	0.009	12.84	19835	21045	NA	H
G6PC2	221453_at	0.016	12.2	5283	9266	19	H
APLP1	209462_at	0.005	11.89	26609	5067	NA	HG
KRT17	212236_x_at	0.006	11.27	25142	1528	NA	H
KRT17	205157_s_at	0.003	10.58	28777	527	NA	H
PTPRN	204945_at	0.07	9.84	118	240	17	H
CRB3	gnf1h06379_at	0.013	12.31	9656	11222	NA	H
ATP2A3	213042_s_at	0.019	11.09	3071	1123	NA	H
ATP2A3	213036_x_at	0.017	10.64	4553	574	27	H
ATP2A3	207522_s_at	0.013	11.44	11066	2091	32	H
ATP2A3	207521_s_at	0.003	12.58	28673	16438	NA	H
KCNMB2	221097_s_at	0.037	10.95	368	911	4	H
HSP90AB1	214359_s_at	0.027	11.13	911	1197	153	H
HSP90AB1	200064_at	0.019	11.81	3310	4288	156	H
PTPRN2	203030_s_at	0.052	10.05	195	299	NA	H
PTPRN2	211534_x_at	0.031	10.81	598	739	NA	H
PTPRN2	203029_s_at	0.029	10.21	736	345	NA	H
CLU	208791_at	0.022	10.9	1809	836	106	H
CLU	208792_s_at	0.02	11.1	2607	1134	114	H
CLU	222043_at	0.008	12.8	21223	20497	89	H
SYT13	221859_at	0.01	12.77	16889	20000	17	H
HMGN3	209377_s_at	0.013	12.25	10941	10011	149	H
ICA1	207949_s_at	0.029	11.07	729	1090	1	H
ICA1	210547_x_at	0.027	11.34	923	1737	NA	H
ICA1	204002_s_at	0.019	11.87	3225	4863	NA	H
ICA1	214191_at	0.01	12.59	17442	16654	NA	H
ICA1	211740_at	0.008	13	21836	23230	31	H
SNAP25	202508_s_at	0.007	11.63	24095	2999	46	H
SNAP25	202507_s_at	0.005	12.52	26933	15210	38	H
TMEM54	gnf1h01148_at	0.013	12.43	9899	13511	117	H
TOB1	202704_at	0.014	12.08	9267	7312	120	H
ENO2	201313_at	0.01	11.74	18363	3718	64	H
SORL1	203509_at	0.012	12.19	13558	9000	115	H
SORL1	212560_at	0.01	12.22	17572	9533	125	H
CNTN1	211203_s_at	0.022	11.62	1784	2952	25	H
NPY	206001_at	0.031	10.59	610	534	42	H
EPHB3	204600_at	0.021	11.77	2214	3981	NA	H
EPHB3	1438_at	0.016	11.98	6122	6054	NA	H
RAMP2	205779_at	0.008	12.57	22161	16228	NA	H
RAMP2	gnf1h07384_s_at	0.006	13.37	24332	26359	NA	H
INPP5E	204706_at	0.009	12.91	20312	22055	NA	H
SYP	213200_at	0.008	12.67	21742	18153	NA	H
HPN	204934_s_at	0.026	10.35	1055	395	20	H
GLIPR1	204221_x_at	0.012	11.89	13502	5051	NA	H
GLIPR1	204222_s_at	0.006	12.09	25554	7467	NA	H
GLIPR1	214085_x_at	0.005	12.36	26413	12104	NA	H
PRPH	213847_at	0.015	12.15	6912	8426	NA	H
XPO4	218479_s_at	0.013	12.46	10327	14063	NA	H
GJA4	204904_at	0.035	10.66	428	587	NA	H
GJA4	40687_at	0.009	12.63	19023	17484	NA	H
CEACAM1	211883_x_at	0.013	12.49	10782	14646	NA	H
CEACAM1	209498_at	0.012	12.31	13150	11123	NA	H
CEACAM1	206576_s_at	0.011	12.73	15738	19177	NA	H
CEACAM1	211889_x_at	0.01	12.78	17631	20116	NA	H
CEACAM1	210610_at	0.01	12.69	17724	18539	NA	H
CEACAM1	gnf1h01663_s_at	0.007	13.16	22885	24833	NA	H
SOX17	219993_at	0.01	12.69	17018	18607	26	H
IGF1	209541_at	0.017	11.82	4662	4430	37	H
IGF1	211577_s_at	0.012	12.21	13039	9358	NA	H
IGF1	209540_at	0.012	11.89	13148	5069	NA	H
IGF1	209542_x_at	0.008	12.12	21952	7936	NA	H
SOX13	38918_at	0.021	11.72	1969	3629	36	H
SOX13	209736_at	0.009	12.8	19944	20437	NA	H
SYTL4	gnf1h02404_s_at	0.017	12.02	4169	6618	NA	H
PROM1	204304_s_at	0.029	10.9	734	831	32	H
GAD1	206670_s_at	0.006	13.23	25401	25371	NA	H
GAD1	205278_at	0.006	12.25	25491	9986	38	H
GAD1	206669_at	0.005	13.27	26716	25665	NA	H
CHI3L1	209395_at	0.025	10.41	1182	423	NA	G
CHI3L1	209396_s_at	0.021	11.25	2158	1475	71	G
CHI3L1	216546_s_at	0.017	11.96	4450	5886	NA	G
TIMP1	201666_at	0.042	10.06	292	302	94	G
ARID4A	205062_x_at	0.007	13.27	23942	25662	68	G
CITED2	209357_at	0.073	9.36	108	175	79	G
CITED2	207980_s_at	0.062	9.52	141	193	48	G
NPHS1	207673_at	0.009	12.87	20107	21503	NA	G
KIRREL2	gnf1h10789_at	0.068	9.97	119	274	NA	G
LRRC7	gnf1h03558_s_at	0.013	12.35	9776	12006	NA	G
LRRC7	gnf1h00365_at	0.009	13.08	18985	24099	NA	G
